# Supplementary material for: One-pot green synthesis of water-soluble carbon nanodots with multicolor photoluminescence from polyethylene glycol
Source: Royal Society of Chemistry journal article supplement (doi:10.1039/c4tb00292j), 2014-01-01
Supplement: c4tb00292j1.pdf [file c4tb00292j1.pdf]

## Supporting Information

### One-pot green synthesis of water-soluble carbon nanodots with multicolor photoluminescence from polyethylene glycol

Moyun Chen, Weizhi Wang<sup>\*a</sup> and Xiaoping Wu<sup>\*b</sup>

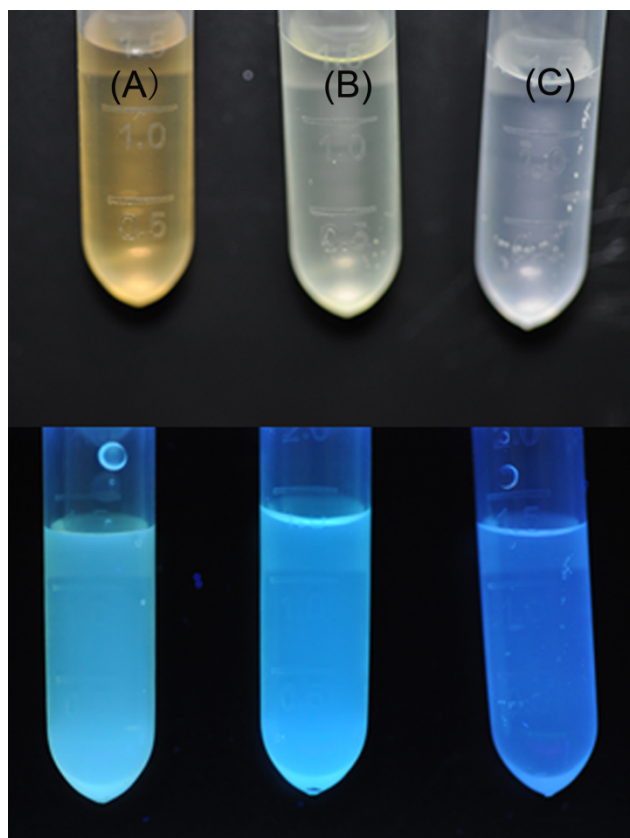

**Fig. S1** The products originated from (A) PEG, (B) PPG and (C) PTMG at 160 °C for 2 h, respectively. (Top: under daylight, down: under 365 nm UV light).

**PAHs:** We utilized an efficient reaction route for preparing PAHs via a mild intramolecular oxidative cyclodehydrogenation (Scheme S1).

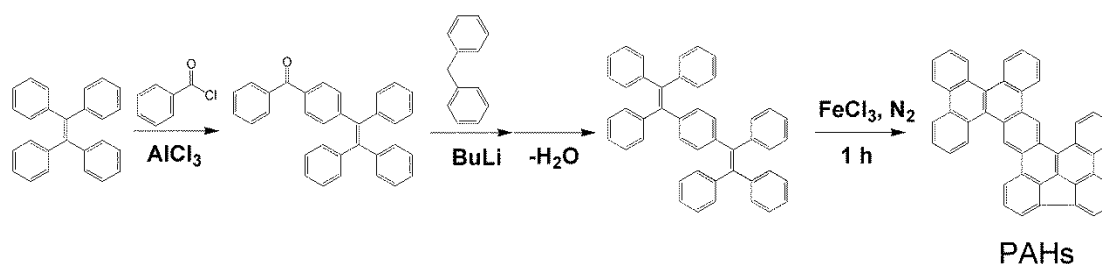

**Scheme S1** Synthetic route for PAHs.

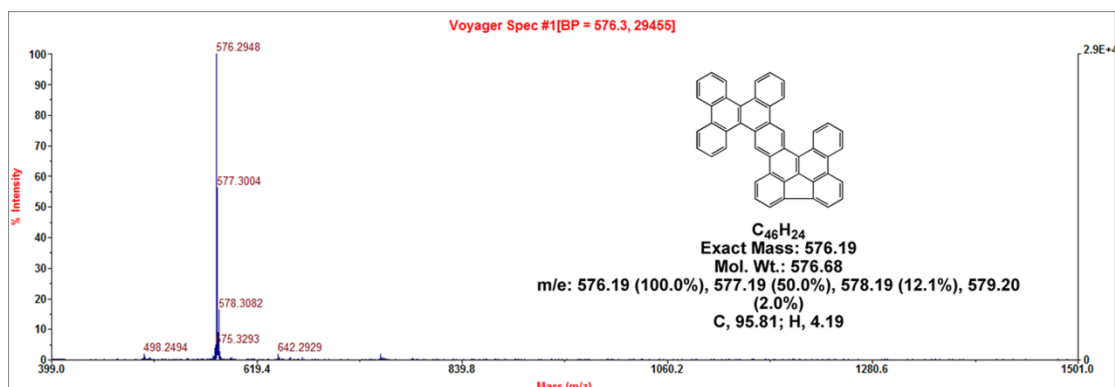

Fig. S2 High resolution mass spectrum (MOLDI-TOF) of PAHs.

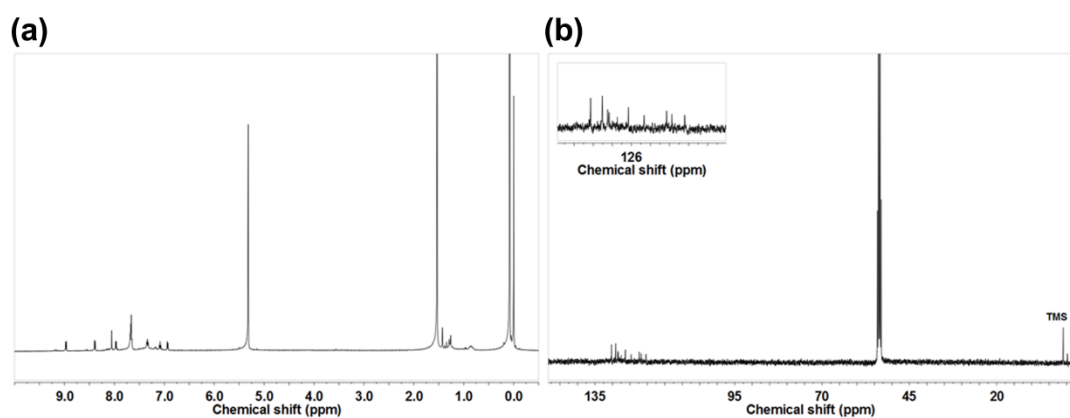

Fig. S3  $^1\text{H}$  NMR and  $^{13}\text{C}$  NMR spectra of PAHs in  $\text{CD}_2\text{Cl}_2$ .

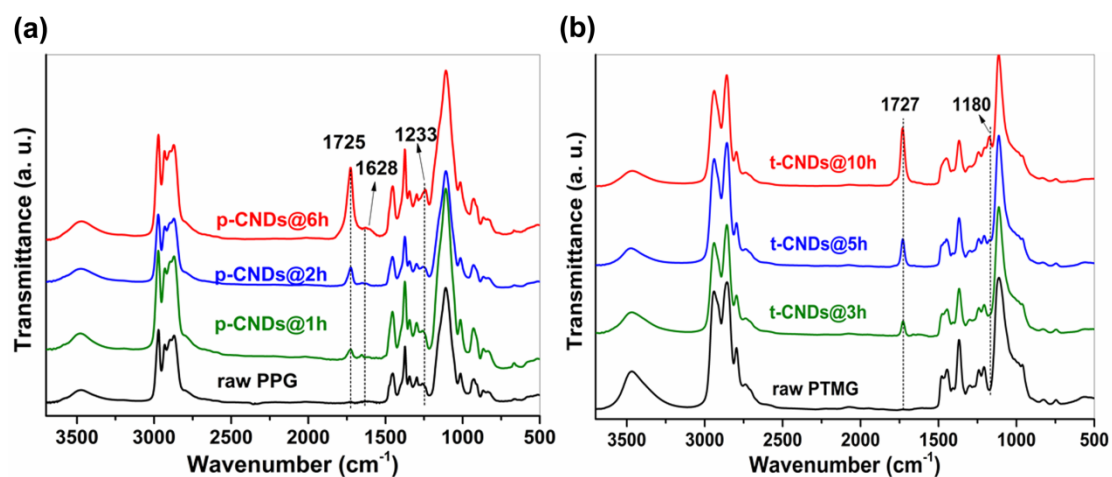

Fig. S4 FTIR spectra of (a) CNDs originated from PPG by heating for 1 h, denoted as p-CNDs@1h; 2 h, denoted as p-CNDs@2h; 6 h, denoted as p-CNDs@6h, (b). CNDs originated from PTMG by heating for 3 h, denoted as t-CNDs@3h; 5 h, denoted as t-CNDs@5h; 10 h, denoted as t-CNDs@10h.

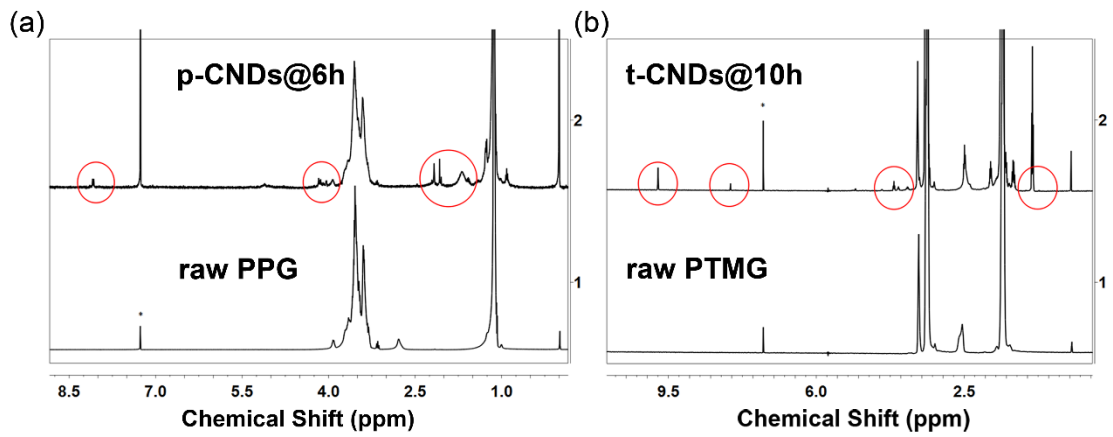

Fig. S5  $^1\text{H}$  NMR spectra of CNDs from (a) PPG and (b) PTMG.

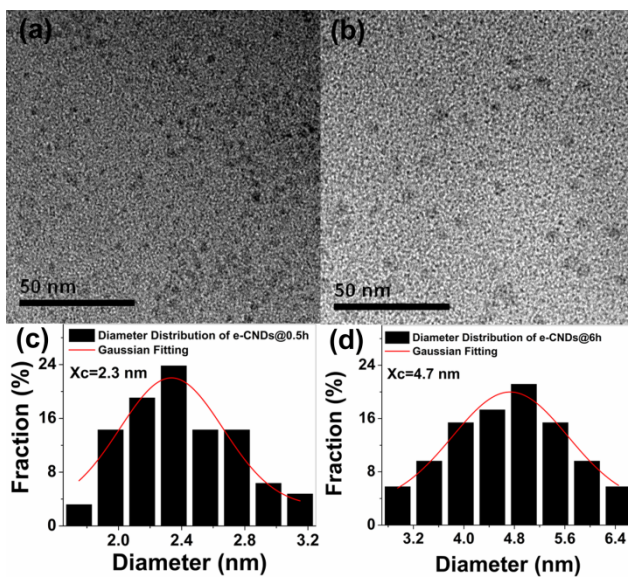

Fig. S6 TEM images of (a) e-CNDs@0.5h and (b) e-CNDs@6h; Diameter distribution of (c) e-CNDs@0.5h and (d) e-CNDs@6h, the red line is the Gaussian fitting curve.

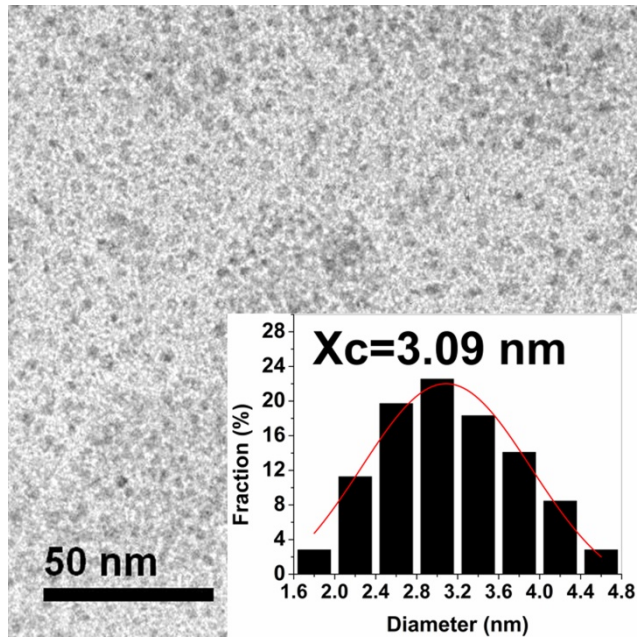

**Fig. S7** TEM images of e-PAHs-CNDs@2h, inset image: diameter distribution of e-PAHs-CNDs@2h (the red line is the Gaussian fitting curve).

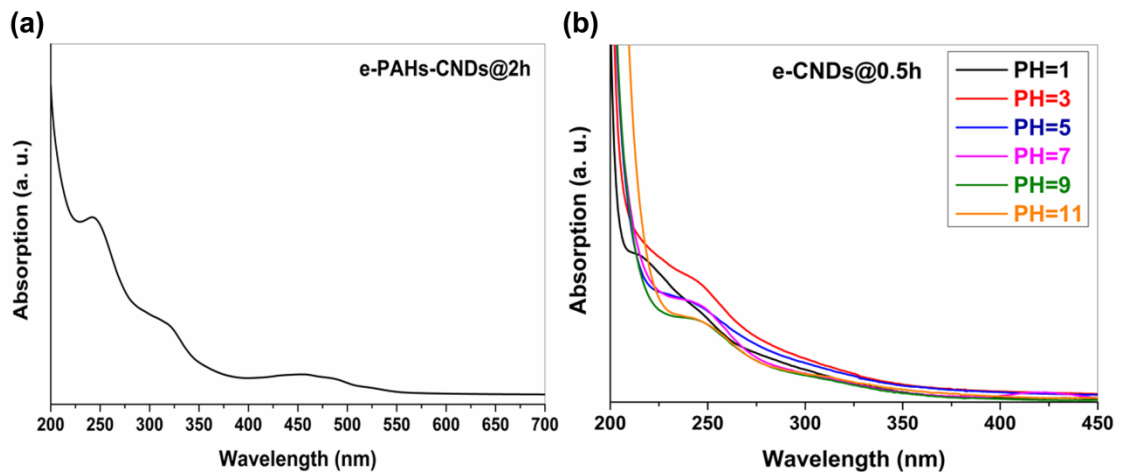

**Fig. S8** UV-vis spectra of (a) e-PAHs-CNDs@2h and e-CNDs@0.5h at different pH varied from 1 to 11.

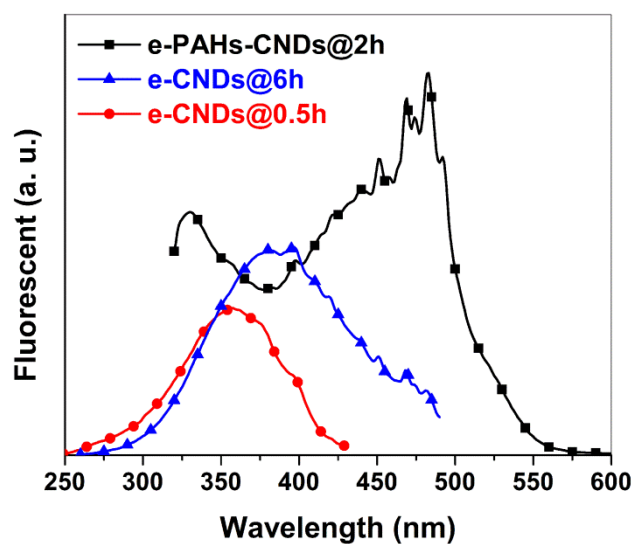

Fig. S9 Fluorescence excitation spectra of CNDs (red: e-CNDs@0.5h, blue: e-CNDs@6h, black: e-PAHs-CNDs@2h).

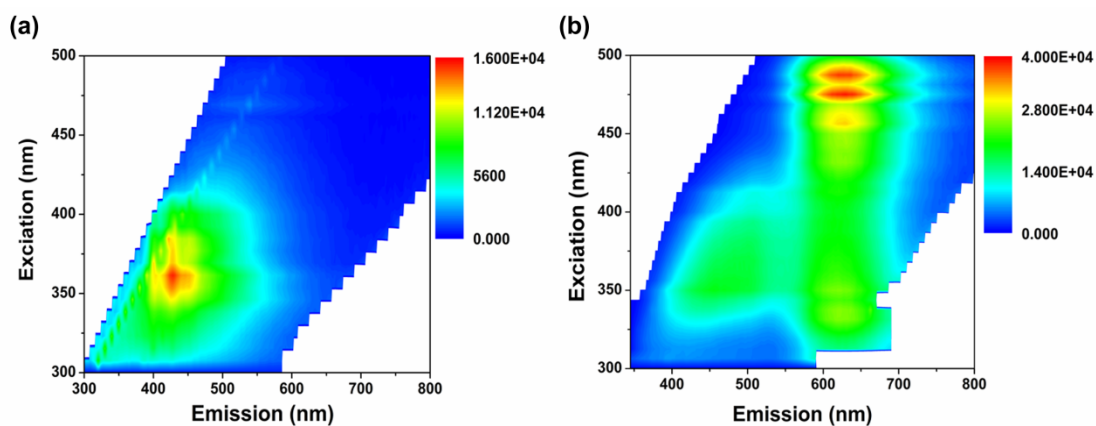

Fig. S10 2D-fluorescence topographical map of CNDs. (a) e-CNDs@0.5h and dispersed in toluene, (b) e-PAHs-CNDs@2h and dispersed in water.

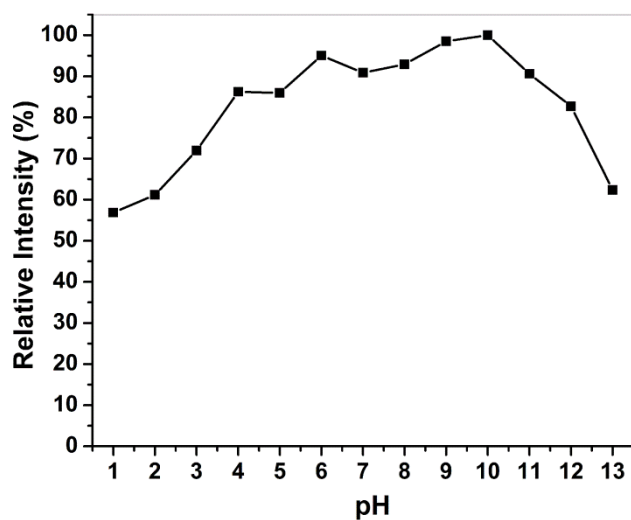

Fig. S11 (a) Effect of pH on the fluorescence intensity at 450 nm (at 360 nm excitation).

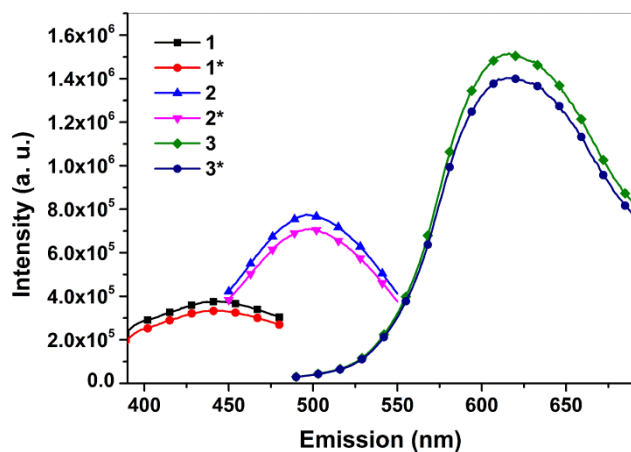

**Fig. S12** PL spectra of CNDs. 1: e-CNDs@0.5h, 2: e-CNDs@6h, 3: e-PAHs-CNDs@2h, corresponding 1\*, 2\* and 3\*: samples stored in the ambient environment for 1 month. (e-CNDs@0.5h, e-CNDs@6h, e-PAHs-CNDs@2h were excited at 360 nm, 390 nm and 470 nm, respectively.)

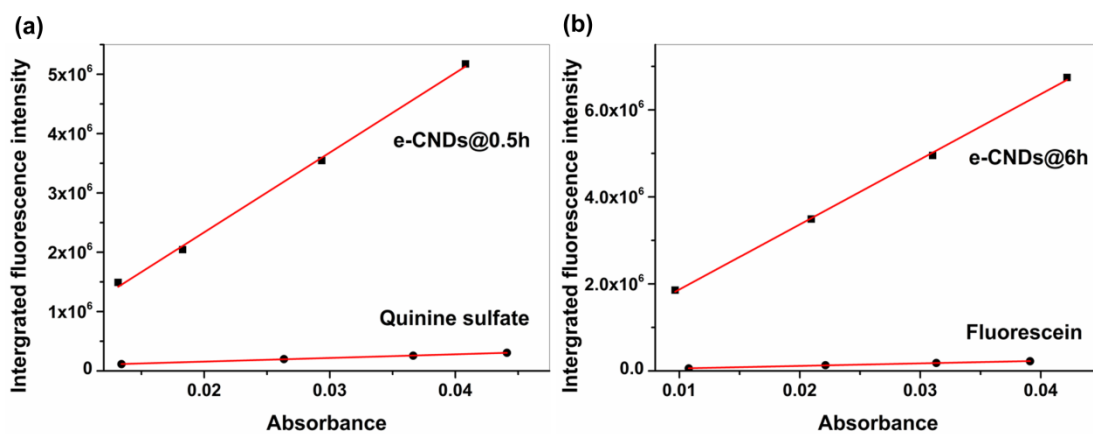

**Fig. S13** Integrated fluorescence intensity versus absorbance plot CNDs and references. (a) e-CNDs@0.5h and quinine sulfate solution; (b) e-CNDs@6h and fluorescein solution.

**Table S1** The value of quantum yields of CNDs.

|                 | M        | R     | $\Phi$ |
|-----------------|----------|-------|--------|
| Quinine sulfate | 1.34E+08 | 0.997 | 55     |
| e-CNDs@0.5h     | 6.15E+06 | 0.998 | 2.51   |
| Fluorescein     | 1.50E+08 | 0.999 | 93     |
| e-CNDs@6h       | 5.83E+06 | 0.996 | 3.58   |
